# Supplementary material for: Human Hepatocyte 4-Acetoxy-N,N-Diisopropyltryptamine Metabolite Profiling by Reversed-Phase Liquid Chromatography Coupled with High-Resolution Tandem Mass Spectrometry
Source: MDPI journal article supplement (doi:10.3390/metabo12080705), 2022-07-29
Supplement: s1 [file s1]

**Supplementary Table S1.** Inclusion list for the MS/MS data-dependent acquisition.

| <b>Transformation</b> | <b>Molecular formula</b>                                        | <b>[M + H]<sup>+</sup><br/>(m/z)</b> | <b>[M - H]<sup>-</sup><br/>(m/z)</b> |
|-----------------------|-----------------------------------------------------------------|--------------------------------------|--------------------------------------|
| Parent (4-AcO-DiPT)   | C <sub>18</sub> H <sub>26</sub> N <sub>2</sub> O <sub>2</sub>   | 303.2067                             | 301.1922                             |
| -2C-2H-O              | C <sub>16</sub> H <sub>24</sub> N <sub>2</sub> O                | 261.1961                             | 259.1816                             |
| +O                    | C <sub>18</sub> H <sub>26</sub> N <sub>2</sub> O <sub>3</sub>   | 319.2016                             | 317.1871                             |
| -3C-6H                | C <sub>15</sub> H <sub>20</sub> N <sub>2</sub> O <sub>2</sub>   | 261.1598                             | 259.1452                             |
| +O-2H                 | C <sub>18</sub> H <sub>24</sub> N <sub>2</sub> O <sub>3</sub>   | 317.1860                             | 315.1714                             |
| +4C+6H+5O             | C <sub>22</sub> H <sub>32</sub> N <sub>2</sub> O <sub>7</sub>   | 437.2282                             | 435.2137                             |
| -2C-2H+2O+S           | C <sub>16</sub> H <sub>24</sub> N <sub>2</sub> O <sub>4</sub> S | 341.1530                             | 339.1384                             |
| -2C-2H+2O+S           | C <sub>16</sub> H <sub>24</sub> N <sub>2</sub> O <sub>4</sub> S | 341.1530                             | 339.1384                             |
| +2H+2O                | C <sub>18</sub> H <sub>28</sub> N <sub>2</sub> O <sub>4</sub>   | 337.2122                             | 335.1976                             |
| -6C-13H-N+O           | C <sub>12</sub> H <sub>13</sub> NO <sub>3</sub>                 | 220.0968                             | 218.0823                             |
| -6C-15H-N+O           | C <sub>12</sub> H <sub>11</sub> NO <sub>3</sub>                 | 218.0812                             | 216.0666                             |
| +10C+17H+3N+7O+S      | C <sub>28</sub> H <sub>43</sub> N <sub>5</sub> O <sub>9</sub> S | 626.2854                             | 624.2709                             |
| -6C-15H-N+2O          | C <sub>12</sub> H <sub>11</sub> NO <sub>4</sub>                 | 234.0761                             | 232.0615                             |
| -2C-2H                | C <sub>16</sub> H <sub>24</sub> N <sub>2</sub> O <sub>2</sub>   | 277.1911                             | 275.1765                             |
| -5C-8H-O              | C <sub>13</sub> H <sub>18</sub> N <sub>2</sub> O                | 219.1492                             | 217.1346                             |
| +2O                   | C <sub>18</sub> H <sub>26</sub> N <sub>2</sub> O <sub>4</sub>   | 335.1965                             | 333.1820                             |
| +6C+8H+7O             | C <sub>24</sub> H <sub>34</sub> N <sub>2</sub> O <sub>9</sub>   | 495.2337                             | 493.2192                             |
| +4O+S                 | C <sub>18</sub> H <sub>26</sub> N <sub>2</sub> O <sub>6</sub> S | 399.1584                             | 397.1439                             |
| -3C-6H+O              | C <sub>15</sub> H <sub>20</sub> N <sub>2</sub> O <sub>3</sub>   | 277.1547                             | 275.1401                             |
| -6C-12H               | C <sub>12</sub> H <sub>14</sub> N <sub>2</sub> O <sub>2</sub>   | 219.1128                             | 217.0983                             |
| +4C+6H+6O             | C <sub>22</sub> H <sub>32</sub> N <sub>2</sub> O <sub>8</sub>   | 453.2231                             | 451.2086                             |
| -2C-2H+3O+S           | C <sub>16</sub> H <sub>24</sub> N <sub>2</sub> O <sub>5</sub> S | 357.1479                             | 355.1333                             |
| -5C-8H                | C <sub>13</sub> H <sub>18</sub> N <sub>2</sub> O <sub>2</sub>   | 235.1441                             | 233.1296                             |
| -2C-2H+O              | C <sub>16</sub> H <sub>24</sub> N <sub>2</sub> O <sub>3</sub>   | 293.1860                             | 291.1714                             |
| -2C-4H                | C <sub>16</sub> H <sub>22</sub> N <sub>2</sub> O <sub>2</sub>   | 275.1754                             | 273.1609                             |
| -8C-17H-N             | C <sub>10</sub> H <sub>9</sub> NO <sub>2</sub>                  | 176.0706                             | 174.0561                             |
| -8C-17H-N+O           | C <sub>10</sub> H <sub>9</sub> NO <sub>3</sub>                  | 192.0655                             | 190.0510                             |
| -3C-8H+O              | C <sub>15</sub> H <sub>18</sub> N <sub>2</sub> O <sub>3</sub>   | 275.1390                             | 273.1245                             |
| -2C+O                 | C <sub>16</sub> H <sub>26</sub> N <sub>2</sub> O <sub>3</sub>   | 295.2016                             | 293.1871                             |
| +8C+15H+3N+6O+S       | C <sub>26</sub> H <sub>41</sub> N <sub>5</sub> O <sub>8</sub> S | 584.2749                             | 582.2603                             |
| +C+6O                 | C <sub>19</sub> H <sub>26</sub> N <sub>2</sub> O <sub>8</sub>   | 411.1762                             | 409.1616                             |
| -5C-8H+3O+S           | C <sub>13</sub> H <sub>18</sub> N <sub>2</sub> O <sub>5</sub> S | 315.1009                             | 313.0864                             |
| +4C+6H+7O             | C <sub>22</sub> H <sub>32</sub> N <sub>2</sub> O <sub>9</sub>   | 469.2181                             | 467.2035                             |
| -2C-2H+4O+S           | C <sub>16</sub> H <sub>24</sub> N <sub>2</sub> O <sub>6</sub> S | 373.1428                             | 371.1282                             |
| +C+5O                 | C <sub>19</sub> H <sub>26</sub> N <sub>2</sub> O <sub>7</sub>   | 395.1813                             | 393.1667                             |
| -8C-14H-O             | C <sub>10</sub> H <sub>12</sub> N <sub>2</sub> O                | 177.1022                             | 175.0877                             |
| -5C-10H               | C <sub>13</sub> H <sub>16</sub> N <sub>2</sub> O <sub>2</sub>   | 233.1285                             | 231.1139                             |
| -8C-16H               | C <sub>10</sub> H <sub>10</sub> N <sub>2</sub> O <sub>2</sub>   | 191.0815                             | 189.0670                             |
| -5C-8H+2O+S           | C <sub>13</sub> H <sub>18</sub> N <sub>2</sub> O <sub>4</sub> S | 299.1060                             | 297.0915                             |

|           |                                                                 |          |          |
|-----------|-----------------------------------------------------------------|----------|----------|
| -2C-4H+O  | C <sub>16</sub> H <sub>22</sub> N <sub>2</sub> O <sub>3</sub>   | 291.1703 | 289.1558 |
| +6C+8H+8O | C <sub>24</sub> H <sub>34</sub> N <sub>2</sub> O <sub>10</sub>  | 511.2286 | 509.2141 |
| +5O+S     | C <sub>18</sub> H <sub>26</sub> N <sub>2</sub> O <sub>7</sub> S | 415.1534 | 413.1388 |
| -6C-14H+O | C <sub>12</sub> H <sub>12</sub> N <sub>2</sub> O <sub>3</sub>   | 233.0921 | 231.0775 |
| -2H+2O    | C <sub>18</sub> H <sub>24</sub> N <sub>2</sub> O <sub>4</sub>   | 333.1809 | 331.1663 |
| -C-O      | C <sub>17</sub> H <sub>26</sub> N <sub>2</sub> O                | 275.2118 | 273.1972 |
| +C+2H+O   | C <sub>19</sub> H <sub>28</sub> N <sub>2</sub> O <sub>3</sub>   | 333.2173 | 331.2027 |
| -C        | C <sub>17</sub> H <sub>26</sub> N <sub>2</sub> O <sub>2</sub>   | 291.2067 | 289.1922 |
| -2H       | C <sub>18</sub> H <sub>24</sub> N <sub>2</sub> O <sub>2</sub>   | 301.1911 | 299.1765 |
| -2C-4H-O  | C <sub>16</sub> H <sub>22</sub> N <sub>2</sub> O                | 259.1805 | 257.1659 |

---
